# Supplementary material for: Effect of Patient Characteristics on Uptake of Screening Using a Mailed Human Papillomavirus Self-sampling Kit: A Secondary Analysis of a Randomized Clinical Trial
Source: PubMed Central journal article supplement (PMC9713609; doi:10.1001/jamanetworkopen.2022.44343), 2022-11-30
Supplement: jamanetwopen-e2244343-s002.pdf [file jamanetwopen-e2244343-s002.pdf]

## Data Sharing Statement

Winer. Effect of Patient Characteristics on Uptake of Screening Using a Mailed Human Papillomavirus Self-sampling Kit. *JAMA Netw Open*. Published November 30, 2022. doi:10.1001/jamanetworkopen.2022.44343

### Data

**Data available:** Yes

**Data types:** Deidentified participant data, Data dictionary

**How to access data:** Requests for data must be sent to [rlw@uw.edu](mailto:rlw@uw.edu).

**When available:** With publication

### Supporting Documents

**Document types:** None

### Additional Information

**Who can access the data:** Data will be made available to researchers whose proposed use of the data has been approved.

**Types of analyses:** Data will be made available for a specified purpose.

**Mechanisms of data availability:** Data will be made available without investigator support to researchers with adequate resources to cover the regulatory and data sharing costs. Data will be made available after approval of a concept proposal aligned with current data approvals, and with a signed data access agreement.
